# Supplementary material for: Adipose-Derived Stromal Vascular Fraction/Xenohybrid Bone Scaffold: An Alternative Source for Bone Regeneration
Source: Hindawi journal article supplement (doi:10.1155/2018/4126379), 2018-01-01
Supplement: f1 [file 4126379.f1.pdf]

**Fig S1**

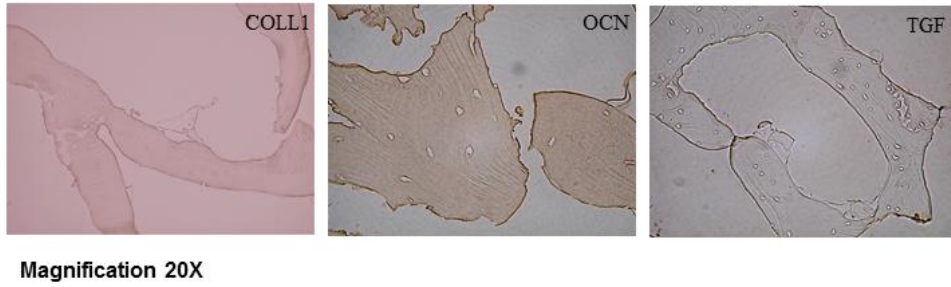

**Fig S1. ALP, OCN and TGF $\beta$  staining on SB.** SB maintained in culture medium only was negative for the expressions of ALP, OCN and TGF $\beta$ .
